# Supplementary material
Source: PubMed Central journal article supplement (PMC2869202)
Supplement: NIHMS171788-supplement-f1.pdf [file NIHMS171788-supplement-f1.pdf]

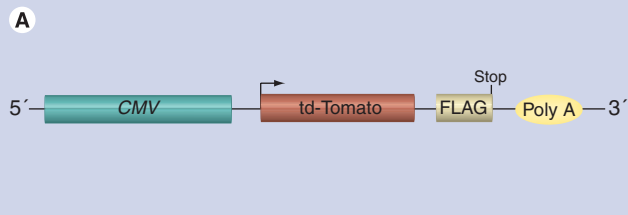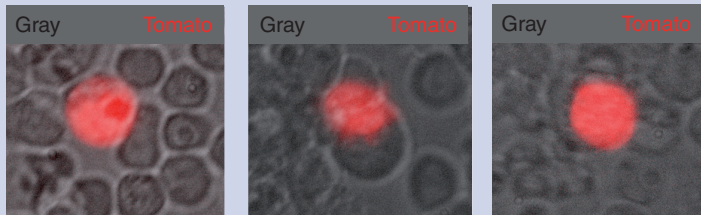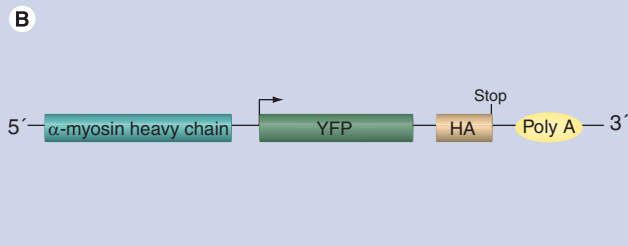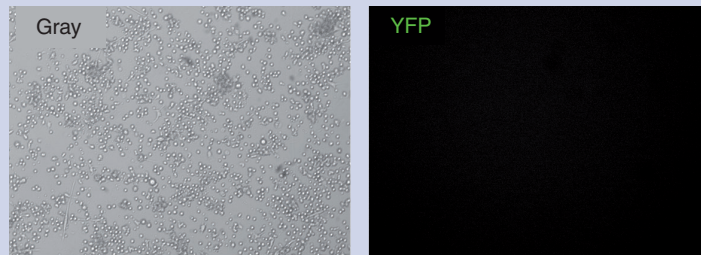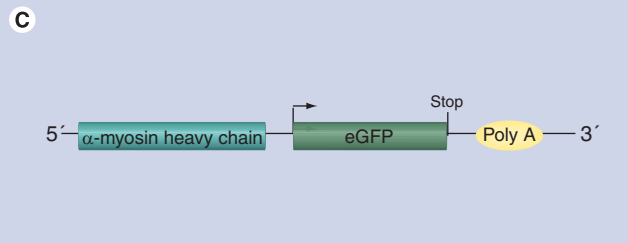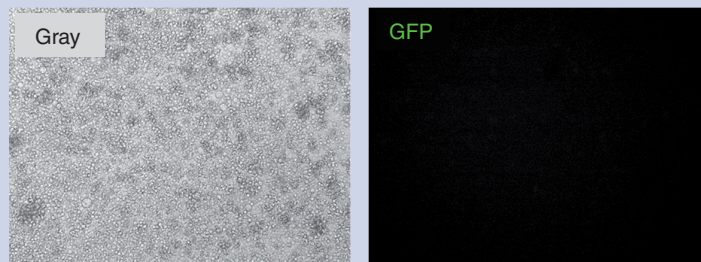

**Supplementary Figure 1. The  $\alpha$ MHC promoter is not active in primary cultured bone marrow stem cells.** Nontransgenic bone marrow stem cells will not express fluorescent markers and tags when transfected with plasmid constructs under the control of the  $\alpha$ -myosin heavy chain ( $\alpha$ MHC) promoter. Nontransgenic bone marrow stem cells were cultured in growth media, transfected with plasmid constructs and allowed to express for 48 h. **(A)** Cells were transfected with a Tomato-Flag construct under the viral CMV promoter as a control. Td-Tomato protein fluorescence in red and phase-contrast pictures are in gray scale. **(B)** Cells were transfected with a YFP-HA construct under the control of the  $\alpha$ MHC promoter. No fluorescence was observed (green) in a wide field of cells (gray scale). **(C)** Cells were transfected with a GFP construct under the control of the  $\alpha$ MHC promoter. No fluorescence was observed (green) in a wide field of cells (gray scale).  
 CMV: Cytomegalovirus; eGFP: Enhanced green fluorescent protein; YFP: Yellow fluorescent protein.
