# Supplementary material
Source: PubMed Central journal article supplement (PMC2869202)
Supplement: NIHMS171788-supplement-f2.pdf [file NIHMS171788-supplement-f2.pdf]

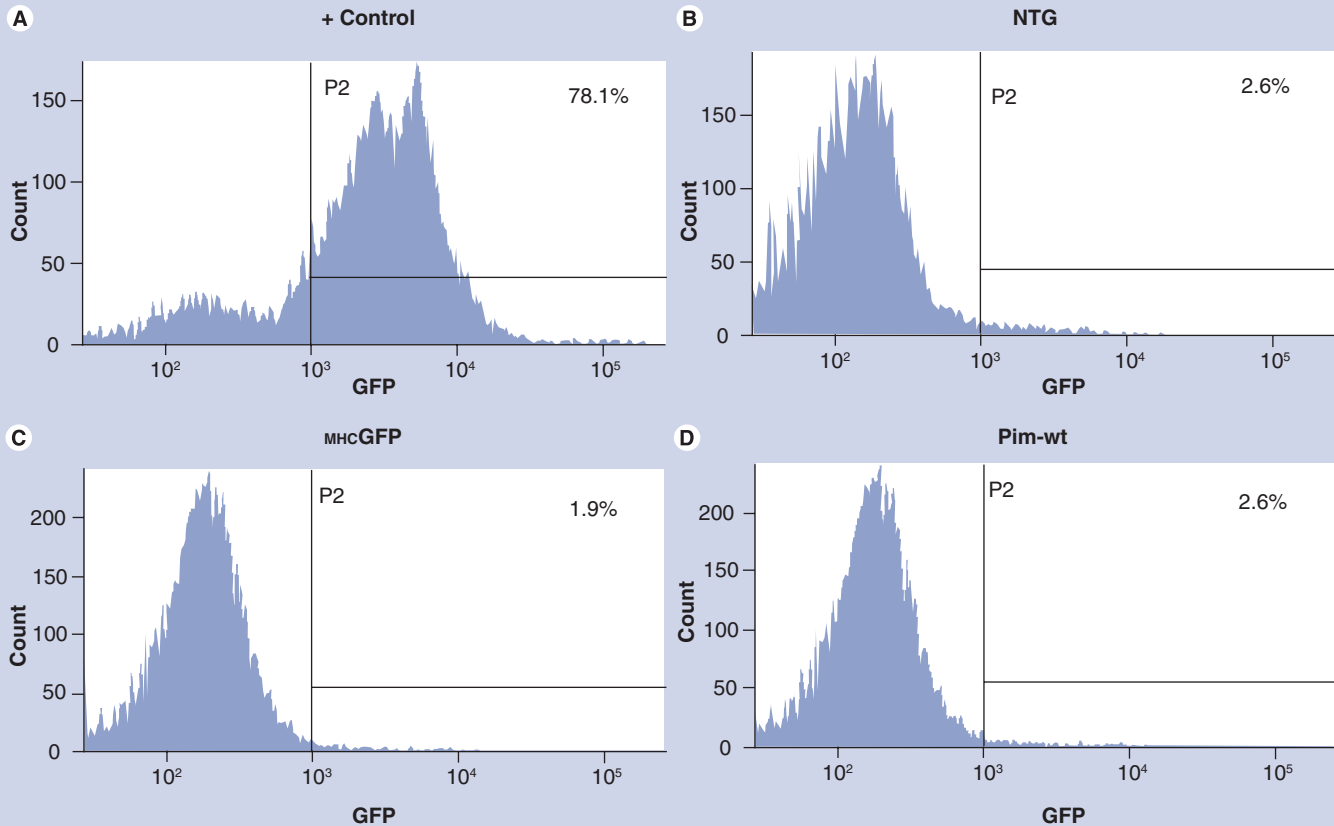

**Supplemental Figure 2. Cells in the bone marrow do not express  $\alpha$ -myosin heavy chain promoter-driven green fluorescent protein. (A)** Whole bone marrow from a Sca-1 knockin mouse expressing GFP under control of the endogenous Sca-1 promoter is GFP positive by flow cytometric analysis. Whole bone marrow from **(B)** NTG, **(C)**  $_{MHC}$  GFP and **(D)**  $_{MHC}$  Pim-wt do not express GFP by flow cytometric analysis.

GFP: Green fluorescent protein; MHC: Myosin heavy chain; NTG: Nontransgenic.
