# Supplementary material
Source: PubMed Central journal article supplement (PMC2869202)
Supplement: NIHMS171788-supplement-f4.pdf [file NIHMS171788-supplement-f4.pdf]

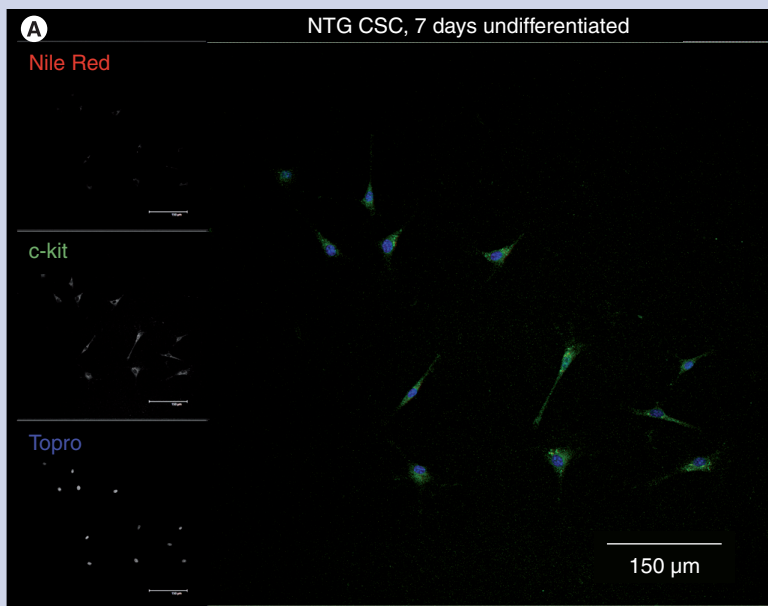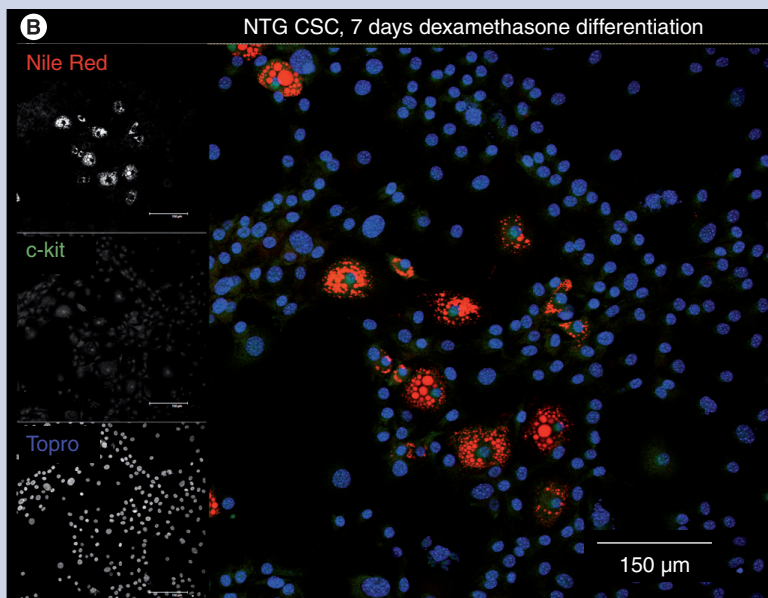

**Supplementary Figure 4. Dexamethasone differentiation of cardiac stem cells induce an adipocyte-like phenotype. (A)** NTG CSCs stained with Nile Red (red), a red fluorescent lipid dye, c-kit (green) and Topro (blue). NTG CSCs are c-kit positive and show very tiny punctuate staining with Nile Red. **(B)** NTG CSCs that have been differentiated in dexamethasone media for 7 days stained with Nile Red (red), c-kit (green) and Topro (blue). Some differentiated cells have an adipocyte-like phenotype with large inclusions of lipid showing Nile Red staining. CSC: Cardiac stem cell; NTG: Nontransgenic.
