# Supplementary material
Source: PubMed Central journal article supplement (PMC2869202)
Supplement: NIHMS171788-supplement-material.pdf [file NIHMS171788-supplement-material.pdf]

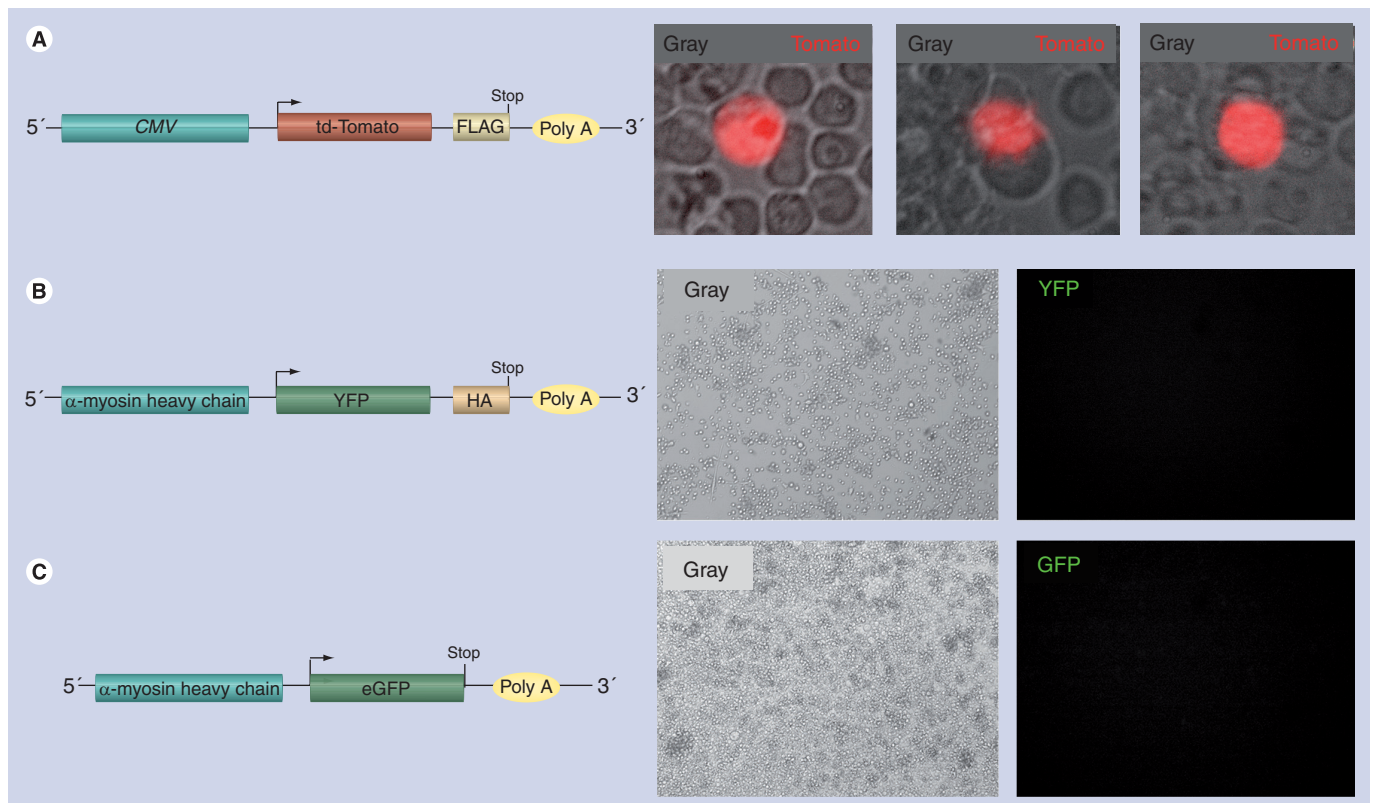

**Supplementary Figure 1. The  $\alpha$ MHC promoter is not active in primary cultured bone marrow stem cells.** Nontransgenic bone marrow stem cells will not express fluorescent markers and tags when transfected with plasmid constructs under the control of the  $\alpha$ -myosin heavy chain ( $\alpha$ MHC) promoter. Nontransgenic bone marrow stem cells were cultured in growth media, transfected with plasmid constructs and allowed to express for 48 h. **(A)** Cells were transfected with a Tomato-Flag construct under the viral CMV promoter as a control. Td-Tomato protein fluorescence in red and phase-contrast pictures are in gray scale. **(B)** Cells were transfected with a YFP-HA construct under the control of the  $\alpha$ MHC promoter. No fluorescence was observed (green) in a wide field of cells (gray scale). **(C)** Cells were transfected with a GFP construct under the control of the  $\alpha$ MHC promoter. No fluorescence was observed (green) in a wide field of cells (gray scale).  
 CMV: Cytomegalovirus; eGFP: Enhanced green fluorescent protein; YFP: Yellow fluorescent protein.

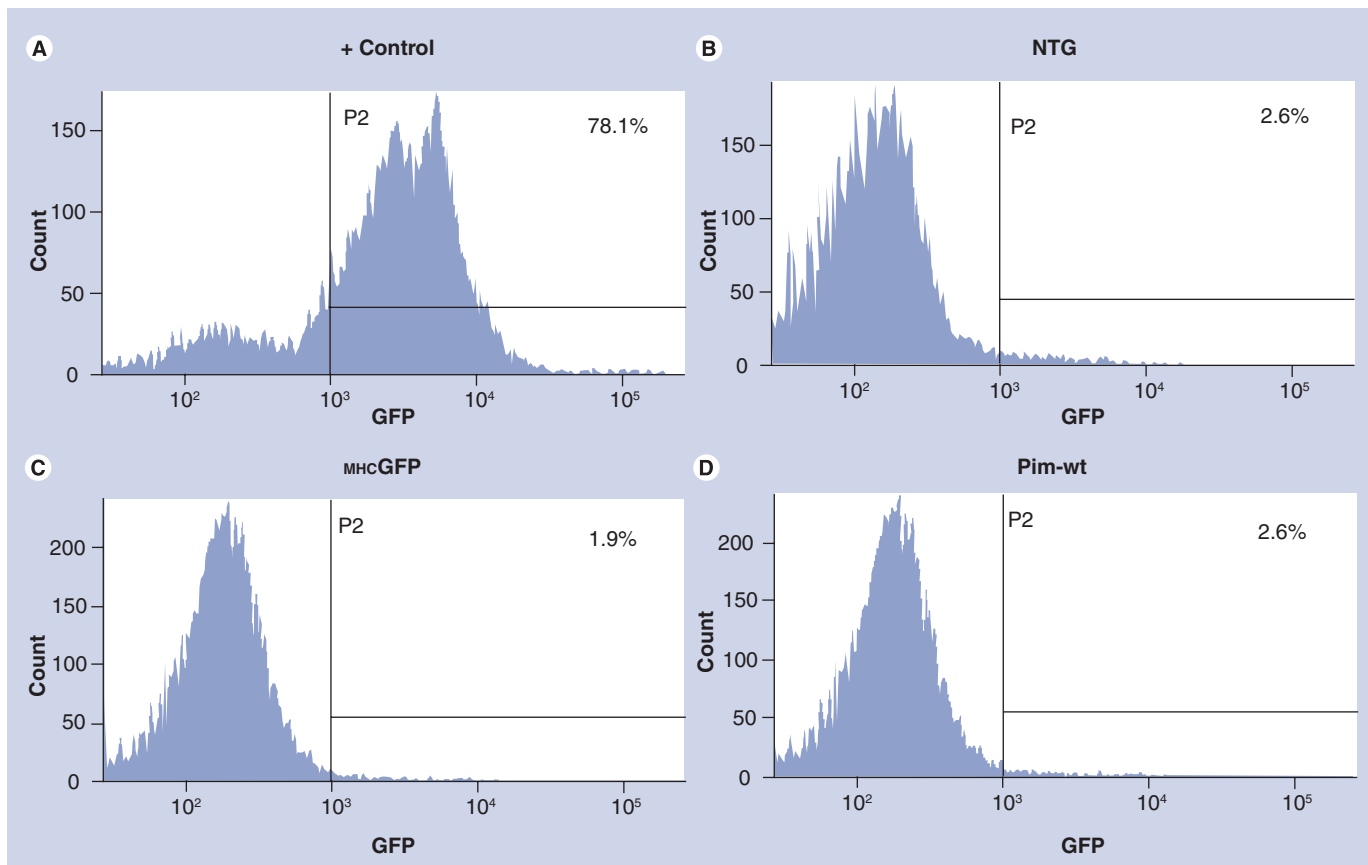

**Supplemental Figure 2. Cells in the bone marrow do not express  $\alpha$ -myosin heavy chain promoter-driven green fluorescent protein.** (A) Whole bone marrow from a Sca-1 knockin mouse expressing GFP under control of the endogenous Sca-1 promoter is GFP positive by flow cytometric analysis. Whole bone marrow from (B) NTG, (C)  $MHC$ -GFP and (D)  $MHC$ -Pim-wt do not express GFP by flow cytometric analysis.

GFP: Green fluorescent protein; MHC: Myosin heavy chain; NTG: Nontransgenic.

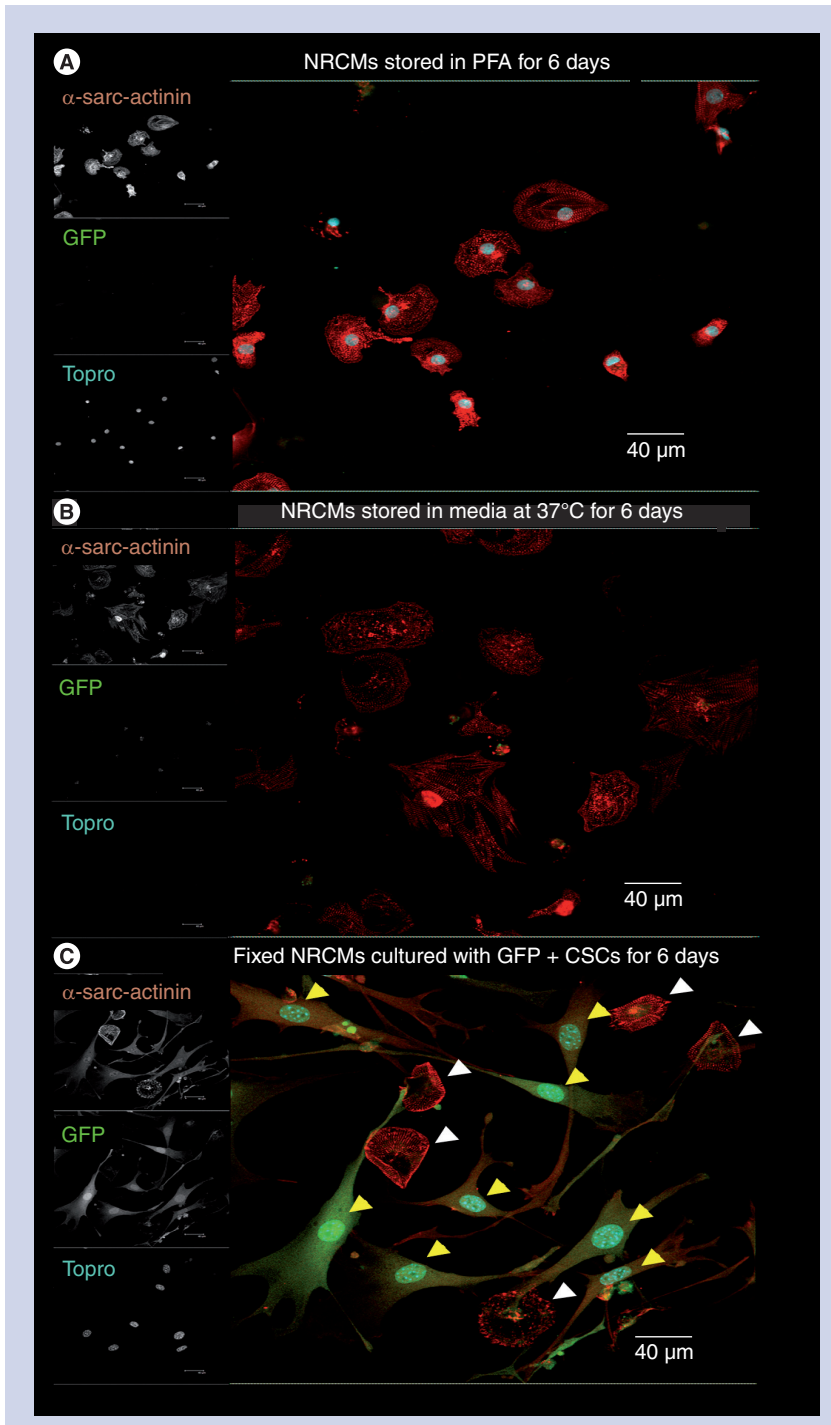

**Supplementary Figure 3. Postfixation incubation of NRCMs in media causes failure of NRCM nuclei to stain with Topro.** **(A)** NRCM culture fixed and incubated in 4% PFA and stained for  $\alpha$ -sarcomeric actinin (red) and Topro (teal). GFP fluorescence was scanned as a control (green). All NRCMs are Topro positive. **(B)** NRCM culture fixed in 4% PFA then incubated in media for 6 days at 37°C and stained for  $\alpha$ -sarcomeric actinin (red) and Topro (teal). GFP fluorescence was scanned as a control (green). None of the NRCMs are Topro positive. **(C)** NRCM culture fixed in 4% PFA then incubated in media with GFP plus CSCs for 6 days at 37°C then stained for  $\alpha$ -sarcomeric actinin (red) and Topro (teal). GFP fluorescence was scanned (green). None of the GFP-negative NRCMs are Topro positive (white arrows) and all of the GFP positive CSCs are Topro positive (yellow arrows). CSC: Cardiac stem cell; GFP: Green fluorescent protein; NRCM: Neonatal rat cardiomyocyte; PFA: Paraformaldehyde.

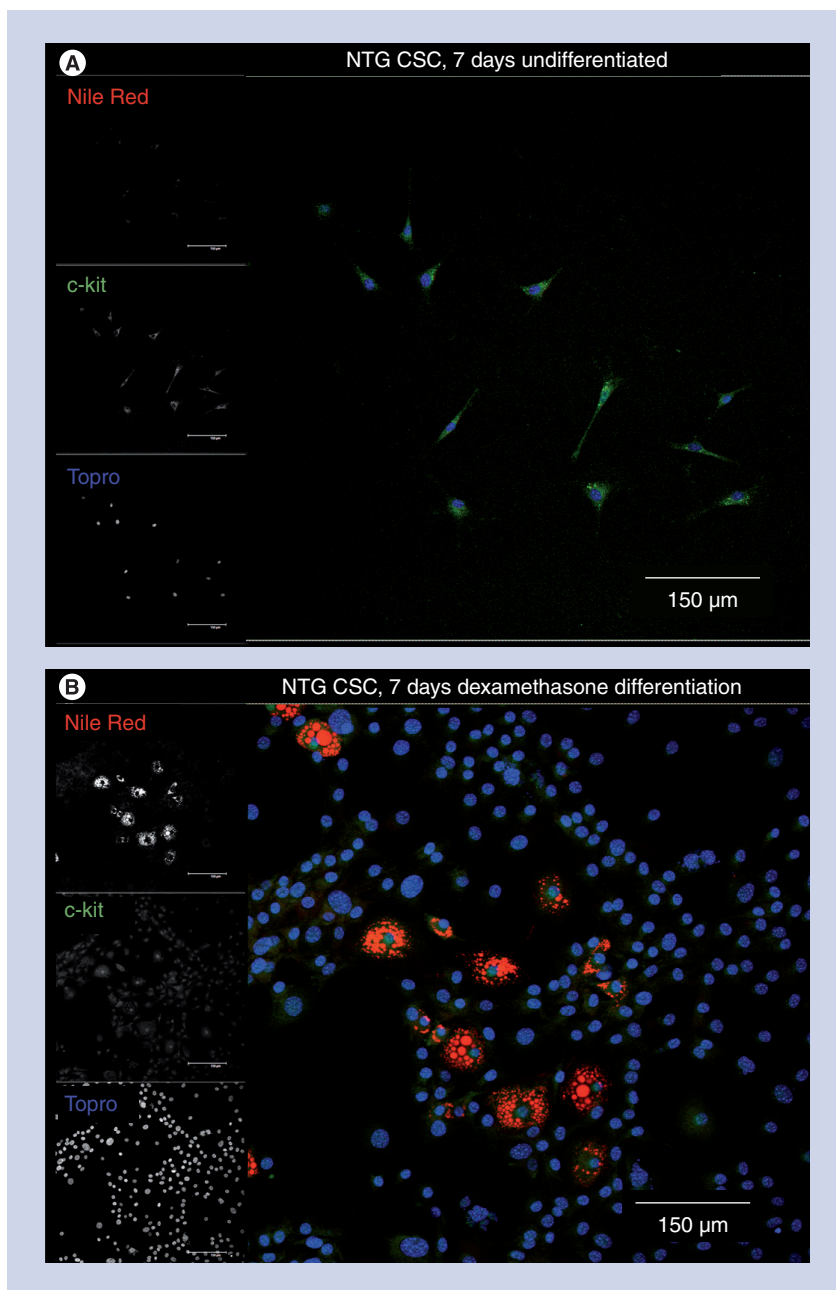

**Supplementary Figure 4. Dexamethasone differentiation of cardiac stem cells induce an adipocyte-like phenotype. (A)** NTG CSCs stained with Nile Red (red), a red fluorescent lipid dye, c-kit (green) and Topro (blue). NTG CSCs are c-kit positive and show very tiny punctuate staining with Nile Red. **(B)** NTG CSCs that have been differentiated in dexamethasone media for 7 days stained with Nile Red (red), c-kit (green) and Topro (blue). Some differentiated cells have an adipocyte-like phenotype with large inclusions of lipid showing Nile Red staining. CSC: Cardiac stem cell; NTG: Nontransgenic.

## Supplementary methods

### ■ Bone marrow isolation & culture

Bone marrow cells (BMCs) were flushed from both tibias and femurs of each mouse using phosphate-buffered saline plus 1% fetal bovine serum buffer. BMCs were separated from red blood cells by density centrifugation using Histopaque<sup>®</sup> reagent according to manufacturer's instructions. The BMCs were either assayed by flow cytometric analysis fresh or cultured in serum-free StemSpan<sup>®</sup> media supplemented with 1% penicillin/streptomycin/glutamine, 100 ng/ml human stem cell factor, 100 ng/ml Flt-3, 20 ng/ml thrombopoietin, 20 ng/ml IL-3 and 20 ng/ml IL-6.

Supplementary Table 1. Antibodies and dilutions.

| Primary antibody             | Species | Dilution | Amplification (paraffin only) | Marker        | Manufacturer     |
|------------------------------|---------|----------|-------------------------------|---------------|------------------|
| c-kit                        | Goat    | 1:50     | Yes                           | Stem cells    | R&D Systems      |
| GFP                          | Rabbit  | 1:200    | Yes                           | Tag           | Molecular Probes |
| Pim-1                        | Rabbit  | 1:50     | Yes                           |               | CST              |
| $\alpha$ -sarcomeric-actinin | Mouse   | 1:100    | No                            | Cardiomyocyte | Sigma            |
| Desmin                       | Mouse   | 1:100    | No                            | Cardiomyocyte | Biosource        |
| Myc-tag                      | Rabbit  | 1:50     | No                            | Tag           | CST              |
| Flag-tag                     | Mouse   | 1:100    | No                            | Tag           | Stratagene       |
| HA-tag                       | Mouse   | 1:100    | No                            | Tag           | Santa Cruz       |

*GFP: Green fluorescent protein.*

Supplementary Table 2. Primer sequences.

| Gene           | F/R | 5'-Primer sequence-3'   | Product length (base pair) | Annealing temperature (°C) |
|----------------|-----|-------------------------|----------------------------|----------------------------|
| <i>Akt-myc</i> | F   | GAAGACATTCTGCGGAACGCCG  | 634                        | 55                         |
| <i>Akt-myc</i> | R   | GAGTTTTTGTCTGCGGCCGTATC | 634                        | 55                         |
| <i>Pim</i>     | F   | GCACTCGAGTGCCCATGGAAGT  | 310                        | 55                         |
| <i>Pim</i>     | R   | TCGATGAGCTTGAGCTCGCC    | 310                        | 55                         |
| <i>GFP</i>     | F   | ATATCATGGCCGACAAG       | 190                        | 55                         |
| <i>GFP</i>     | R   | TCTGATCGCGCTTCTCGTT     | 190                        | 55                         |
| <i>GAPDH</i>   | F   | CAATTCAACGCCACACTCAA    | 150                        | 55                         |
| <i>GAPDH</i>   | R   | CCTTCTCCATGCTGGTGAA     | 150                        | 55                         |
