# Supplementary material
Source: PubMed Central journal article supplement (PMC2869202)
Supplement: NIHMS171788-supplement-methods.pdf [file NIHMS171788-supplement-methods.pdf]

---

## Supplementary methods

### ■ Bone marrow isolation & culture

Bone marrow cells (BMCs) were flushed from both tibias and femurs of each mouse using phosphate-buffered saline plus 1% fetal bovine serum buffer. BMCs were separated from red blood cells by density centrifugation using Histopaque<sup>®</sup> reagent according to manufacturer's instructions. The BMCs were either assayed by flow cytometric analysis fresh or cultured in serum-free StemSpan<sup>®</sup> media supplemented with 1% penicillin/streptomycin/glutamine, 100 ng/ml human stem cell factor, 100 ng/ml Flt-3, 20 ng/ml thrombopoietin, 20 ng/ml IL-3 and 20 ng/ml IL-6.
