# Supplementary material
Source: PubMed Central journal article supplement (PMC2869202)
Supplement: NIHMS171788-supplement-t1.pdf [file NIHMS171788-supplement-t1.pdf]

**Supplementary Table 1. Antibodies and dilutions.**

| <b>Primary antibody</b>      | <b>Species</b> | <b>Dilution</b> | <b>Amplification<br/>(paraffin only)</b> | <b>Marker</b> | <b>Manufacturer</b> |
|------------------------------|----------------|-----------------|------------------------------------------|---------------|---------------------|
| c-kit                        | Goat           | 1:50            | Yes                                      | Stem cells    | R&D Systems         |
| GFP                          | Rabbit         | 1:200           | Yes                                      | Tag           | Molecular Probes    |
| Pim-1                        | Rabbit         | 1:50            | Yes                                      |               | CST                 |
| $\alpha$ -sarcomeric-actinin | Mouse          | 1:100           | No                                       | Cardiomyocyte | Sigma               |
| Desmin                       | Mouse          | 1:100           | No                                       | Cardiomyocyte | Biosource           |
| Myc-tag                      | Rabbit         | 1:50            | No                                       | Tag           | CST                 |
| Flag-tag                     | Mouse          | 1:100           | No                                       | Tag           | Stratagene          |
| HA-tag                       | Mouse          | 1:100           | No                                       | Tag           | Santa Cruz          |

*GFP: Green fluorescent protein.*
