# Supplementary material
Source: PubMed Central journal article supplement (PMC2869202)
Supplement: NIHMS171788-supplement-t2.pdf [file NIHMS171788-supplement-t2.pdf]

**Supplementary Table 2. Primer sequences.**

| <b>Gene</b>    | <b>F/R</b> | <b>5'-Primer sequence-3'</b> | <b>Product length<br/>(base pair)</b> | <b>Annealing<br/>temperature (°C)</b> |
|----------------|------------|------------------------------|---------------------------------------|---------------------------------------|
| <i>Akt-myc</i> | F          | GAAGACATTCTGCGGAACGCCG       | 634                                   | 55                                    |
| <i>Akt-myc</i> | R          | GAGTTTTTGTCTGCGGCCGTATC      | 634                                   | 55                                    |
| <i>Pim</i>     | F          | GCACTCGAGTGCCCATGGAAGT       | 310                                   | 55                                    |
| <i>Pim</i>     | R          | TCGATGAGCTTGAGCTCGCC         | 310                                   | 55                                    |
| <i>GFP</i>     | F          | ATATCATGGCCGACAAG            | 190                                   | 55                                    |
| <i>GFP</i>     | R          | TCTGATCGCGCTTCTCGTT          | 190                                   | 55                                    |
| <i>GAPDH</i>   | F          | CAATTCAACGCCCACTCAA          | 150                                   | 55                                    |
| <i>GAPDH</i>   | R          | CCTTCTCCATGCTGGTGAA          | 150                                   | 55                                    |
